# Supplementary material
Source: Royal Society of Chemistry journal article supplement (doi:10.1039/d6cy00148c)
Supplement: d6cy00148c1.pdf [file d6cy00148c1.pdf]

# Supporting Information

## Solvent-Free Recycling of Polystyrene Waste into Valuable Mono-aromatics over Ni/NbO<sub>x</sub> Catalyst

Zhen Yan,<sup>a</sup> Leyang Qi,<sup>a</sup> Jicong Yan,<sup>a</sup> Qi Zhang,<sup>a</sup> Fuping Tian,<sup>b</sup> and Xiang Wang<sup>\*a</sup>

<sup>a</sup> State Key Laboratory of Fine Chemicals, School of Chemical Engineering, Dalian University of Technology, Dalian, Liaoning 116024, China

<sup>b</sup> School of Chemistry, Dalian University of Technology, Dalian, Liaoning 116024, China

### Supporting information content

**Number of pages: 11**

**Number of Figures: 1**

## Table of Contents for Supplement Information

|                                                                                                                                           |            |
|-------------------------------------------------------------------------------------------------------------------------------------------|------------|
| <b>Figure S1.</b> NMR spectra of liquid product of 1Ni/NbO <sub>x</sub> . .....                                                           | <b>S3</b>  |
| <b>Figure S2.</b> <sup>13</sup> C- <sup>1</sup> H HSQC NMR of liquid product of 1Ni/NbO <sub>x</sub> .....                                | <b>S4</b>  |
| <b>Figure S3.</b> Gas product of 1Ni/ NbO <sub>x</sub> .....                                                                              | <b>S5</b>  |
| <b>Figure S4.</b> Structural formulas of different products .....                                                                         | <b>S6</b>  |
| <b>Table S1.</b> Comparison of the formation rate of mono- aromatics of various catalysts for hydrocracking and hydrogenolysis of PS..... | <b>S7</b>  |
| <b>Figure S5.</b> XRD patterns of Ni/ NbO <sub>x</sub> and standard cards .....                                                           | <b>S8</b>  |
| <b>Figure S6.</b> Raman spectroscopy of Ni/ NbO <sub>x</sub> .....                                                                        | <b>S9</b>  |
| <b>Figure S7.</b> TEM images of 1Ni/ NbO <sub>x</sub> .....                                                                               | <b>S10</b> |
| <b>Figure S8.</b> XPS spectra of 2.5 、 5 、 10 Ni/NbO <sub>x</sub> .....                                                                   | <b>S11</b> |
| <b>Figure S9.</b> H <sub>2</sub> -TPR profiles of 1-10Ni+NbO <sub>x</sub> ,1Ni/NbO <sub>x</sub> and NbO <sub>x</sub> .....                | <b>S12</b> |
| <b>Figure S10.</b> H <sub>2</sub> Pulse Experiment of 1Ni+NbO <sub>x</sub> and 1Ni/NbO <sub>x</sub> .....                                 | <b>S13</b> |
| <b>Figure S11.</b> GC chromatogram recorded using an FID detector of gas products from the reaction of PS over 1Ni/NbO <sub>x</sub> ..... | <b>S14</b> |
| <b>REFERENCES</b> .....                                                                                                                   | <b>S15</b> |

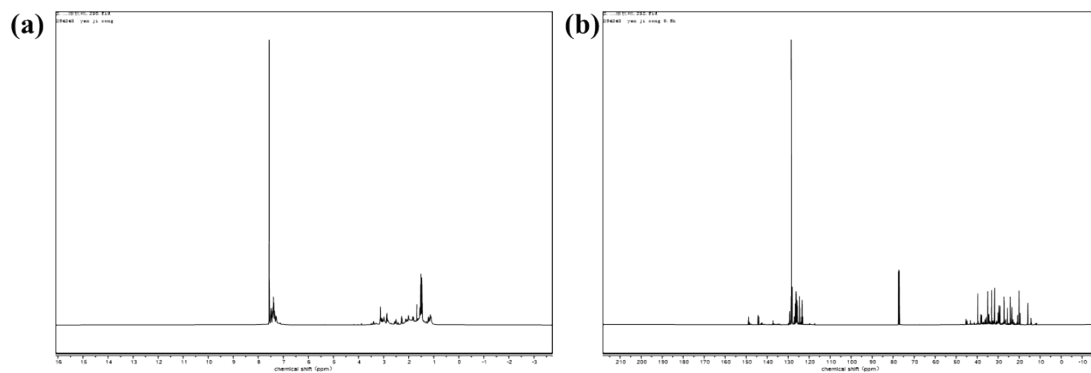

**Figure S1** NMR spectra of liquid product of 1Ni/NbO<sub>x</sub>. (a, and b, <sup>1</sup>H and <sup>13</sup>C NMR regions, respectively.)

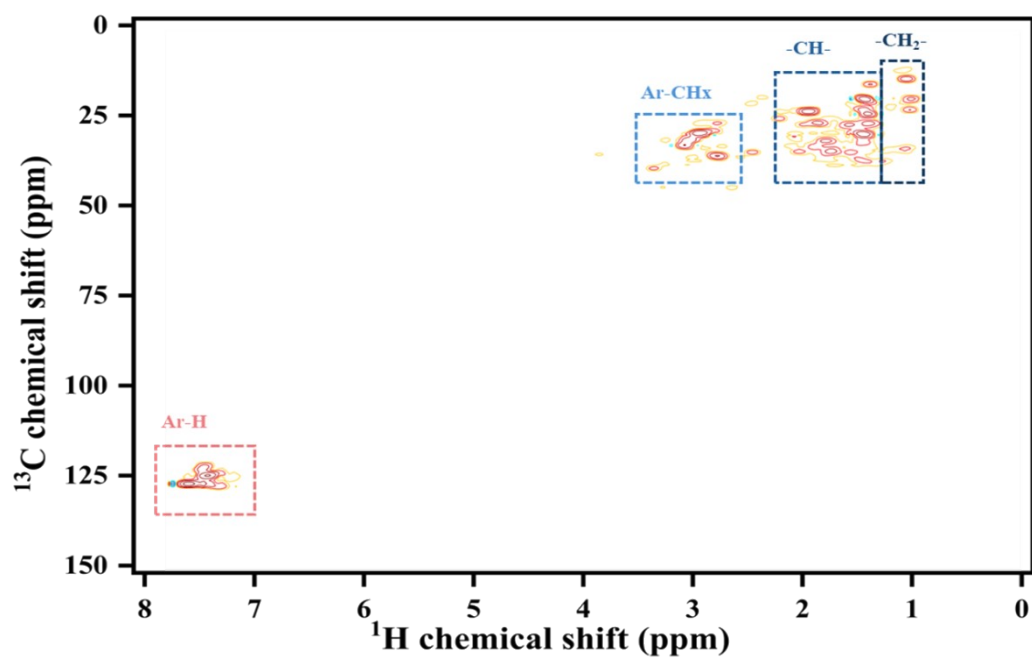

Figure S2  $^{13}\text{C}$ - $^1\text{H}$  HSQC NMR of liquid product of 1Ni/NbO<sub>x</sub>

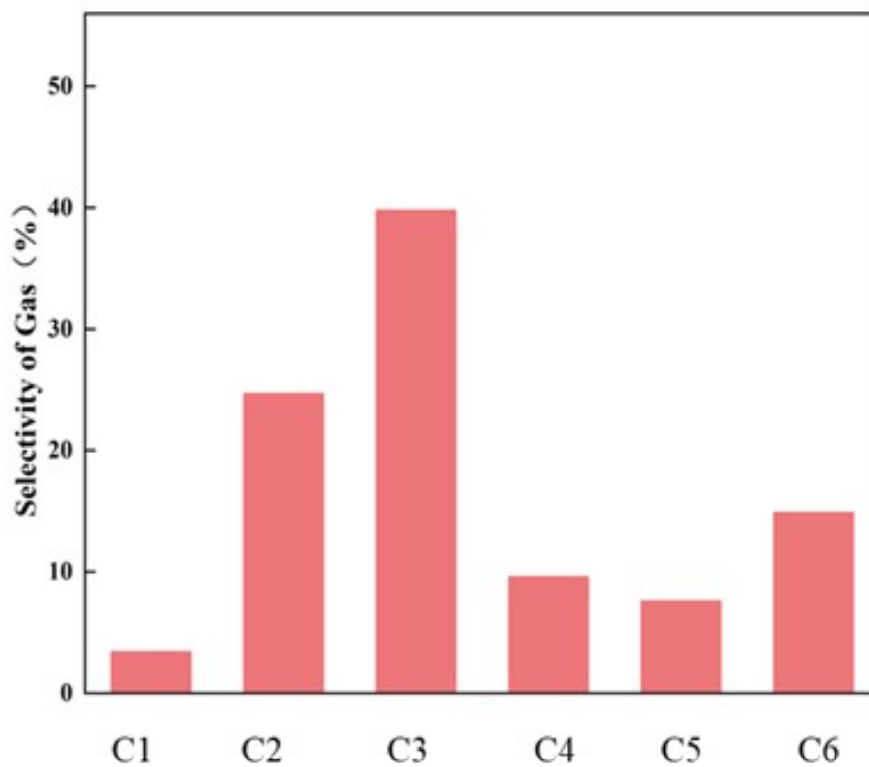

**Figure S3** Gas product of 1Ni/NbO<sub>x</sub>, reaction conditions: 260 °C, 3 · 24 h, and 3 MPa H<sub>2</sub>, 4g PS, 0.4g catalyst.  
**Note :** The gas yield is 7.57%

1. Mono-aromatics

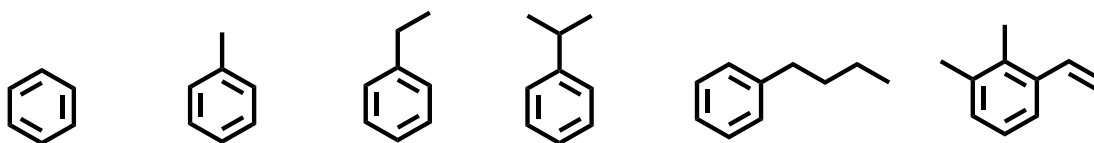

2. Diphenyl alkanes

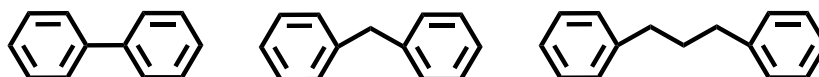

3. Hydrogenated derivatives of multiphenyl alkanes

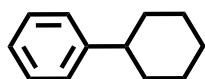

4. Alkyl-substituted indanes

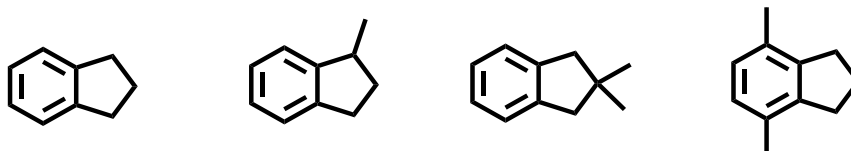

5. Alkyl-substituted tetralins

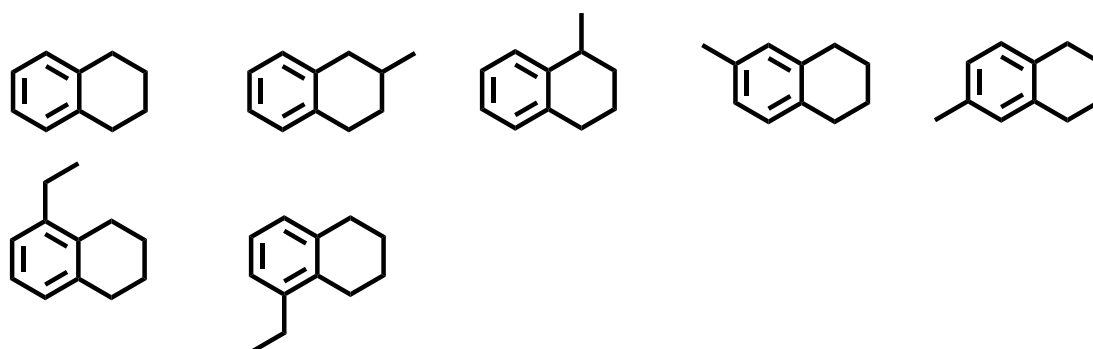

Figure S4 Structural formulas of different products

| Entry | Catalyst                | Temp. / °C | P. of H <sub>2</sub> / MPa | Time / h | Solvent            | R (g <sub>alkylbenzenes</sub> / g <sub>cat.</sub> / h) | Ref.      |
|-------|-------------------------|------------|----------------------------|----------|--------------------|--------------------------------------------------------|-----------|
| 1     | Ni/NbO <sub>x</sub>     | 260        | 3                          | 3        | -                  | 2.02                                                   | This work |
| 2     | MoS <sub>x</sub> -Hbeta | 250        | 3                          | 20       | -                  | 1.445                                                  | [1]       |
| 3     | Ru/SiO <sub>2</sub>     | 280        | -                          | 6        | CH <sub>3</sub> OH | 1.405                                                  | [2]       |
| 4     | NbOPO <sub>4</sub>      | 280        | 0.5                        | 12       | Octane             | 0.081                                                  | [3]       |
| 5     | Ru/NbO <sub>x</sub>     | 300        | 0.5                        | 16       | Octane             | 0.0124                                                 | [4]       |
| 6     | Ru/TiO <sub>2</sub>     | 300        | -                          | 20       | Decane             | 0.04                                                   | [5]       |
| 7     | Ni/SiO <sub>2</sub>     | 300        | 7                          | 6        | -                  | 1.3                                                    | [6]       |

**Table S1** Comparison of the formation rate of mono-aromatics of various catalysts for hydrocracking and hydrogenolysis of PS.

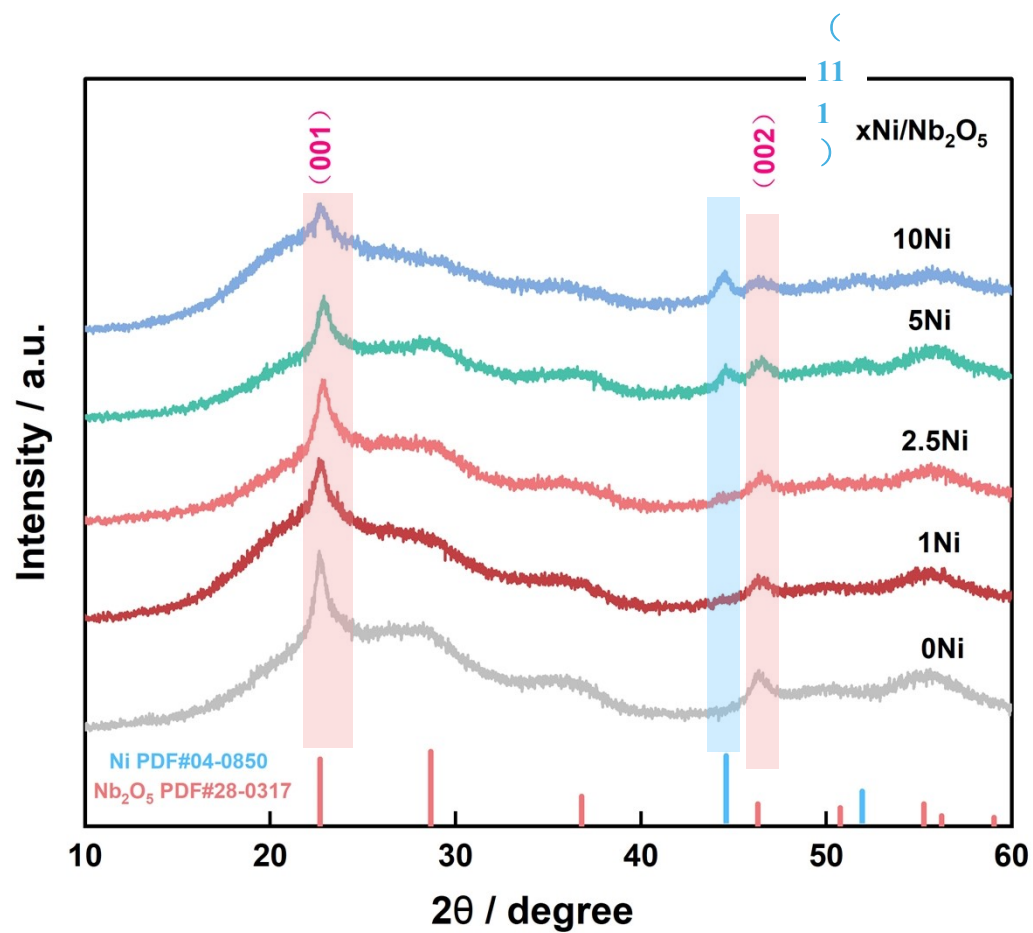

Figure S5 XRD patterns of Ni/NbO<sub>x</sub> and standard cards.

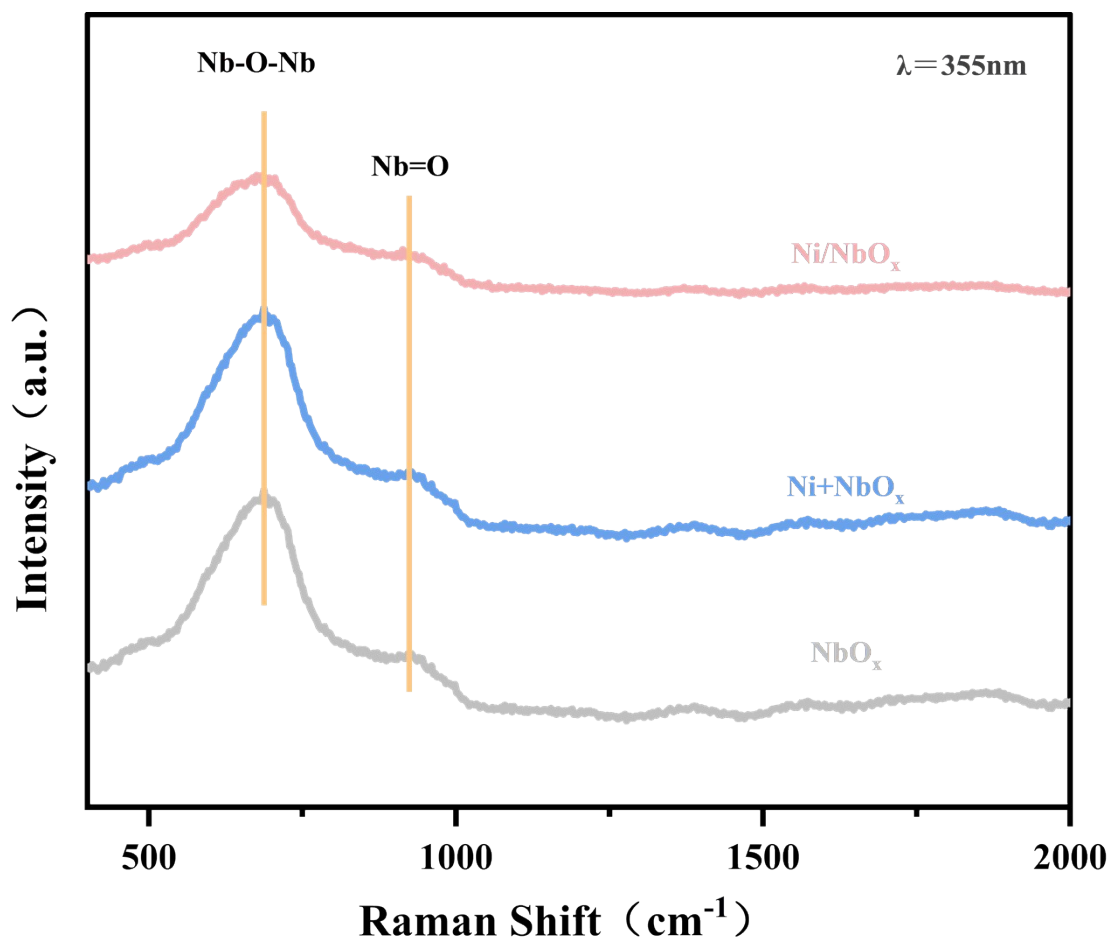

Figure S6. Raman spectroscopy of Ni/NbO<sub>x</sub>.

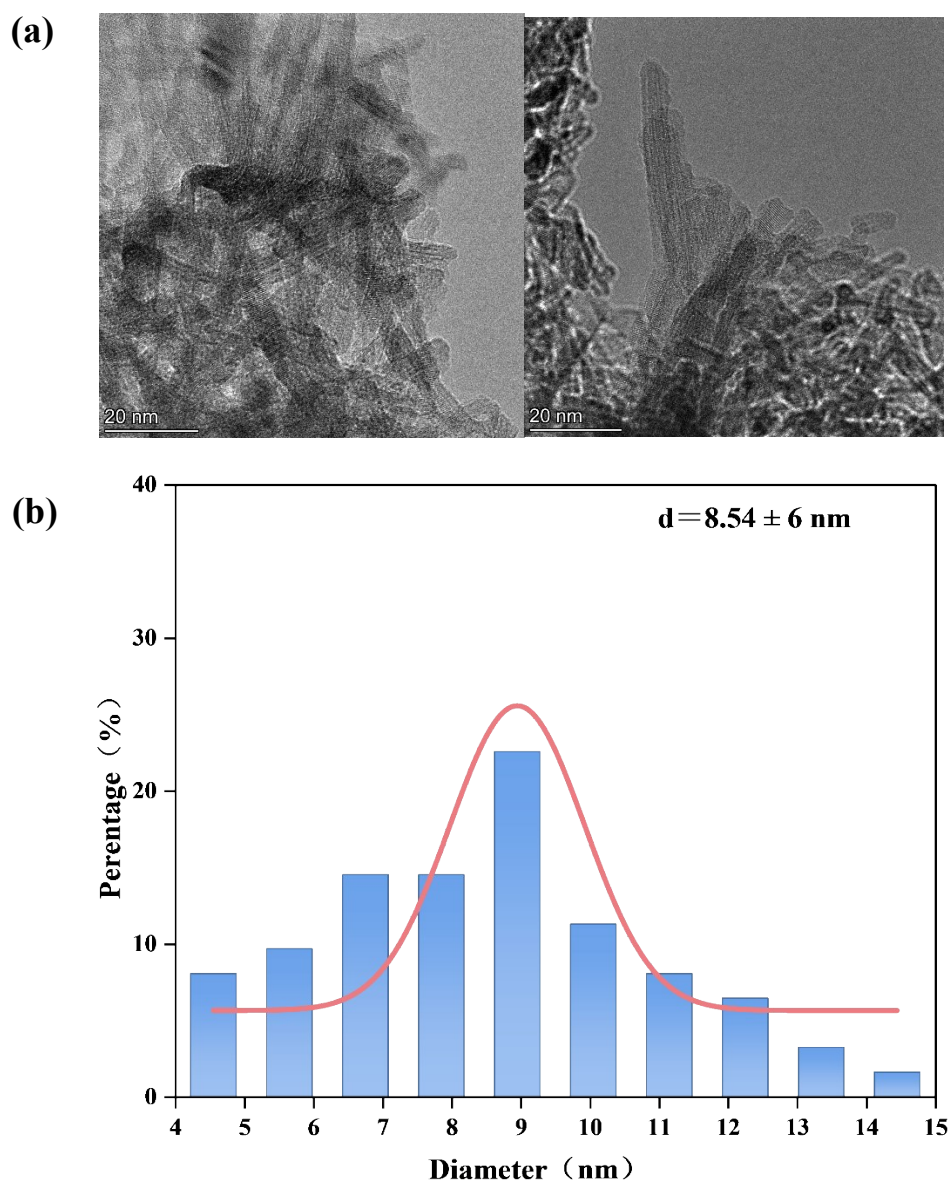

**Figure S7** (a) TEM images and (b) their corresponding particle size distributions of 1Ni/NbO<sub>x</sub>.

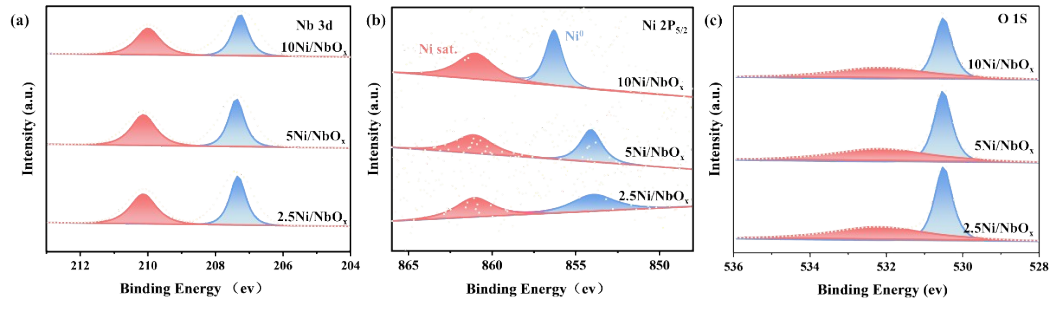

**Figure S8** (a-c) Nb 3d, Ni 2P<sub>1/2</sub>, O 1S XPS spectra of 2.5 · 5 · 10 Ni/NbO<sub>x</sub>;

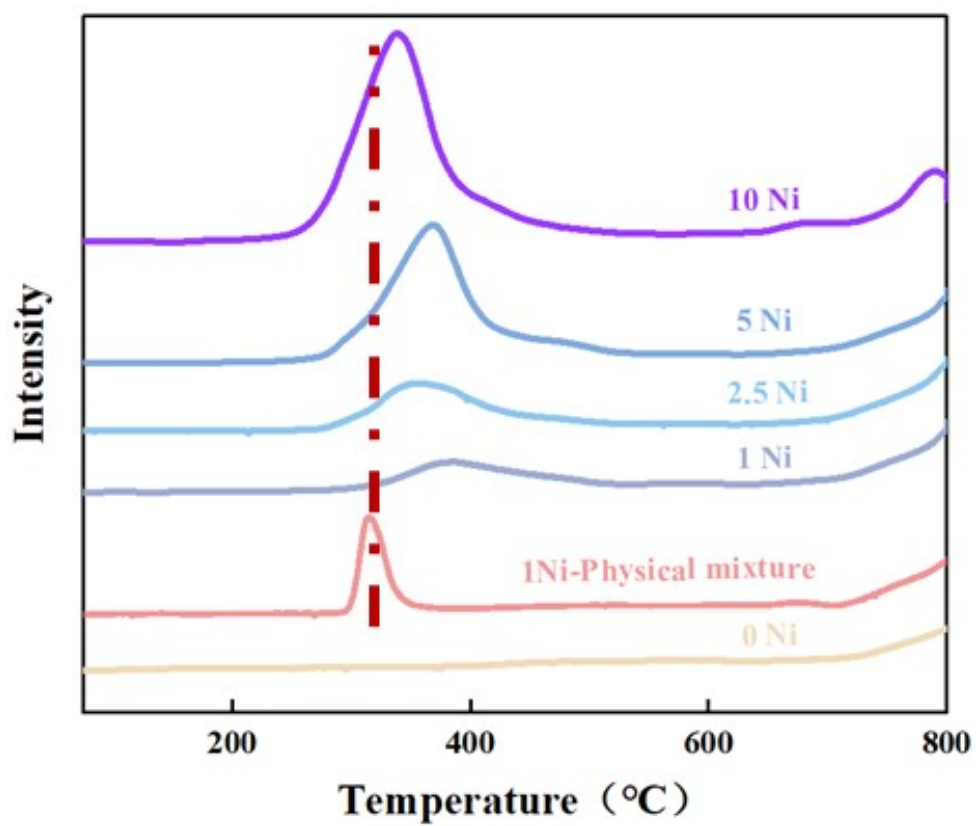

Figure S9 H<sub>2</sub>-TPR profiles of 1-10Ni+NbO<sub>x</sub>, 1Ni/NbO<sub>x</sub> and NbO<sub>x</sub>;

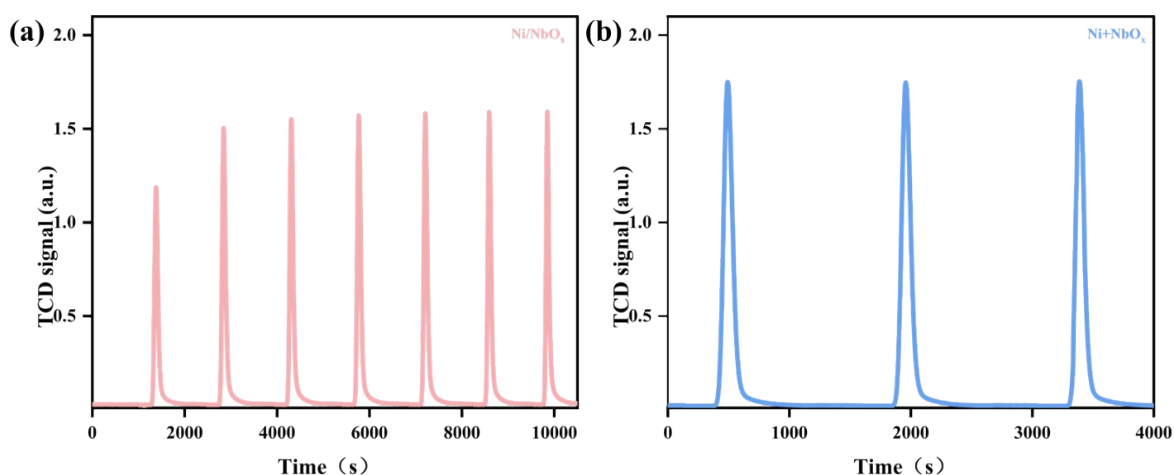

**Figure S10** (a-b) H<sub>2</sub> Pulse Experiment of 1Ni+NbO<sub>x</sub> and 1Ni/NbO<sub>x</sub>.

**Note :**

The number of surface-exposed Ni atoms was calculated assuming dissociative adsorption of hydrogen on metallic Ni with a stoichiometry of  $H/Ni_{surf} = 1$ , corresponding to one hydrogen atom adsorbed per surface Ni atom. Accordingly, one molecule of H<sub>2</sub> was assumed to account for two surface Ni atoms. The surface Ni amount ( $\mu\text{mol g}^{-1}$ ) was therefore calculated as twice the measured H<sub>2</sub> uptake.

The total amount of Ni atoms was determined from the nominal Ni loading and the molar mass of Ni ( $58.69 \text{ g mol}^{-1}$ ). Ni dispersion (D) was calculated as the ratio of surface Ni atoms to total Ni atoms according to the following equation:

$$D (\%) = \frac{2 \times n_{H_2}}{(W_{Ni}/100) / 58.69} \times 100\%$$

where  $n_{H_2}$  is the measured H<sub>2</sub> uptake ( $\mu\text{mol g}^{-1}$ ) and  $W_{Ni}$  is the Ni loading (wt%).

It should be noted that for Ni supported on NbO<sub>x</sub>, strong metal–support interactions and incomplete reduction may suppress hydrogen adsorption, leading to an underestimation of the absolute Ni dispersion.

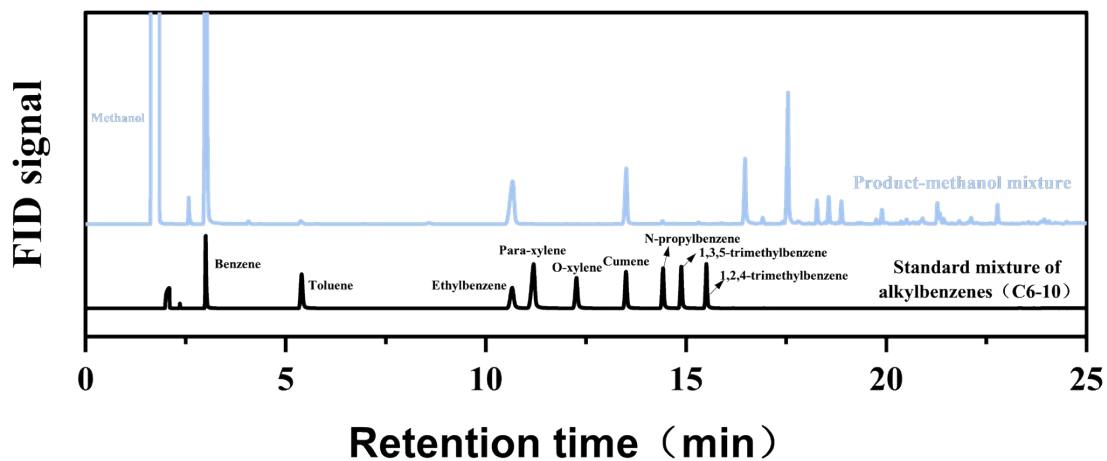

**Figure S11.** GC chromatogram recorded using an FID detector of gas products from the reaction of PS over 1Ni/NbO<sub>x</sub> at 260 °C under 3 MPa of H<sub>2</sub> for 3 hours

## References:

- [1] Zhang, G.; Mao, Q.; Yue, Y.; Gao, R.; Duan, Y.; Du, H. Ni-based catalysts supported on Hbeta zeolite for the hydrocracking of waste polyolefins. *RSC Advances* **2024**, *14* (23), 15856-15861. DOI: 10.1039/d4ra02809k.
- [2] Zeng, L.; Yan, T.; Du, J.; Liu, C.; Dong, B.; Qian, B.; Xiao, Z.; Su, G.; Zhou, T.; Peng, Z.; et al. Recycling Valuable Alkylbenzenes from Polystyrene through Methanol-Assisted Depolymerization. *Angewandte Chemie International Edition* **2024**, *63* (24). DOI: 10.1002/anie.202404952.
- [3] Zhou, H.; Chen, L.; Guo, Y.; Liu, X.; Wu, X.-P.; Gong, X.-Q.; Wang, Y. Hydrogenolysis Cleavage of the C<sub>sp2</sub>-C<sub>sp3</sub> Bond over a Metal-Free NbOPO<sub>4</sub> Catalyst. *ACS Catalysis* **2022**, *12* (9), 4806-4812. DOI: 10.1021/acscatal.2c00034.
- [4] Jing, Y.; Wang, Y.; Furukawa, S.; Xia, J.; Sun, C.; Hülsey, M. J.; Wang, H.; Guo, Y.; Liu, X.; Yan, N. Towards the Circular Economy: Converting Aromatic Plastic Waste Back to Arenes over a Ru/Nb<sub>2</sub>O<sub>5</sub> Catalyst. *Angewandte Chemie International Edition* **2021**, *60* (10), 5527-5535. DOI: 10.1002/anie.202011063.
- [5] Manal, A. K.; Zhao, J.; Bal, R.; Srivastava, R. Selective Upcycling of Aromatic Polymer Waste into Light C<sub>6</sub>-C<sub>9</sub> Aromatics Over Ru-Supported Catalysts. *ChemSusChem* **2025**, *18* (15). DOI: 10.1002/cssc.202500902.
- [6] Vance, B. C.; Najmi, S.; Vlachos, D. G. Polystyrene Hydrogenolysis to High-Quality Lubricants Using Ni/SiO<sub>2</sub>. *ACS Catalysis* **2024**, *14* (7), 5389-5402. DOI: 10.1021/acscatal.3c05900.
